# Supplementary material
Source: ML conference proceedings conference paper supplement (https://proceedings.neurips.cc/paper_files/paper/2013/hash/e5f6ad6ce374177eef023bf5d0c018b6-Abstract.html)
Supplement: Supplementary file 2 [file e5f6ad6ce374177eef023bf5d0c018b6-Supplemental.zip]

---

# Binary to Bushy: Bayesian Hierarchical Clustering with the Beta Coalescent

---

**Yuening Hu<sup>1</sup>, Jordan Boyd-Graber<sup>2</sup>, Hal Daumè III<sup>1</sup>, Z. Irene Ying<sup>3</sup>**

<sup>1</sup>Computer Science, <sup>2</sup>School and UMIACS, <sup>3</sup>Agricultural Research Service

<sup>1,2</sup>University of Maryland, <sup>3</sup>Department of Agriculture

ynhu@cs.umd.edu, {jbg, hal}@umiacs.umd.edu, irene.ying@gmail.com

This document provides additional information for the submission: a reference for notation, the Dirichlet process mixture models sampling (DPMM) with a Gaussian base distribution, and the procedure for generating synthetic data (including examples of generated and reconstructed trees).

## 1 Review of Notation

|                              |                                                                                                                  |
|------------------------------|------------------------------------------------------------------------------------------------------------------|
| $n$                          | the number of observations                                                                                       |
| $m$                          | the total number of coalescent events                                                                            |
| $t_i$                        | the time when the $i^{th}$ coalescent event happens                                                              |
| $n_i$                        | the number of nodes at time $t_i$                                                                                |
| $\delta_i$                   | the time duration between $t_i$ and $t_{i-1}$ , and $t_i = t_{i-1} - \delta_i$                                   |
| $\pi$                        | a tree structure                                                                                                 |
| $\lambda_n^k$                | the rate at which $k$ out of $n$ nodes merge into a parent node                                                  |
| $\lambda_n$                  | the total rate of any children set merging of $n$ nodes                                                          |
| $\gamma$                     | a fraction of nodes coalescing                                                                                   |
| $\Lambda(d\gamma)$           | a finite measure on $[0, 1]$                                                                                     |
| $\alpha$                     | the parameter of beta distribution                                                                               |
| $\rho_i$                     | a node                                                                                                           |
| $\rho_{\vec{c}_i}$           | a set of children nodes of node $\rho_i$                                                                         |
| $ \rho_{\vec{c}_i} $         | the size of children set $\rho_{\vec{c}_i}$                                                                      |
| $\mathbf{x}$                 | the data observations                                                                                            |
| $y_i$                        | the feature vector associated with node $\rho_i$                                                                 |
| $p_0(y_i)$                   | the initial distribution of node $\rho_i$ with feature $y_i$                                                     |
| $\kappa_{t_i t_b}(y_i, y_b)$ | the transition kernel from node feature $y_i$ formed at $t_i$ to node feature $y_b$ formed at $t_b$              |
| $\mu$                        | the mutation rate                                                                                                |
| $M_{\rho_i}(y_i)$            | the message of node $\rho_i$ with node feature $y_i$                                                             |
| $Z_{\rho_i}$                 | the local normalizer at node $\rho_i$                                                                            |
| $Z_{-\infty}$                | the normalizer at $-\infty$                                                                                      |
| $\theta_i$                   | the subtree structure of all observations at time $t_i$                                                          |
| $s$                          | the particle index                                                                                               |
| $w_i^s$                      | the weight of particle $s$ at time $t_i$                                                                         |
| $f$                          | the proposal distribution                                                                                        |
| $Z_0$                        | the normalizer of local normalizers $Z_{\rho_i}$                                                                 |
| $\Omega_i$                   | a restricted set of children sets at time $t_i$                                                                  |
| $\omega_{i,j}$               | the $j^{th}$ children set of $\Omega_i$ , also a subset of the $n_{i-1}$ nodes that could coalesced at event $i$ |
| $\beta$                      | the concentration parameter of Dirichlet process                                                                 |
| $G_0$                        | the base distribution of Dirichlet process                                                                       |
| $G$                          | a distribution over mixtures drawn from a Dirichlet process: $G \sim \text{DP}(\beta, G_0)$                      |
| $u_i$                        | the $i^{th}$ mixture component of Dirichlet process mixture models                                               |
| $\Lambda$                    | the covariance matrix of Brownian Diffusion                                                                      |
| $\mathbf{I}$                 | the identity matrix                                                                                              |
| $\mathbb{I}$                 | the indicator                                                                                                    |
| $\mathcal{N}$                | the Gaussian distribution                                                                                        |

## 2 DPMM with Gaussian Base Distribution

This section reviews how we select the restriction set  $\Omega_i$  by Dirichlet process mixture models (DPMM).

Given the Brownian diffusion kernel, a natural choice for the base distribution of the DP in the DPMM is a Gaussian. We review Gibbs sampling for this model [1], which provides distributions over partitions that become the restriction set.

We initialize partitions randomly and then repeatedly resample which partition each node is in. This is possible through the exchangeability of the Dirichlet process.

Let  $x_n$  be the current node and  $\mathbf{x}_{-n}$  all other nodes,  $z_n$  the current node's cluster assignment,  $\mathbf{z}_{-n}$  all other nodes' cluster assignments,  $n_k$  is the number of nodes assigned to cluster  $k$ , and  $N$  is the total number of observations. As before,  $\beta$  is the Dirichlet process concentration parameter. We assume that the base distribution  $G_0$  is a Gaussian distribution with mean  $\mu_0$  and covariance  $\Sigma_0$  and that each cluster has known covariance  $\Sigma_k$ , thus the conditional distribution is

$$p(z_n = k | \mathbf{z}_{-n}, \mathbf{x}, \mu, \beta) = \begin{cases} \frac{n_k \mathcal{N}(x_n; \hat{\mu}_k, \hat{\Sigma}_k)}{\beta + N - 1} & k \text{ is old} \\ \frac{\beta \mathcal{N}(x_n; \mu_0, \Sigma_0)}{\beta + N - 1} & k \text{ is new,} \end{cases} \quad (1)$$

where

$$\hat{\mu}_k = \frac{\mu_0 \Sigma_0^{-1} + \sum_{i \neq n} \mathbb{I}[z_i = k] x_i \cdot \Sigma_k^{-1}}{\Sigma_0^{-1} + \sum_{i \neq n} \mathbb{I}[z_i = k] \cdot \Sigma_k^{-1}}, \quad \hat{\Sigma}_k = \frac{1 + \Sigma_0^{-1} \Sigma_k + \sum_{i \neq n} \mathbb{I}[z_i = k]}{\Sigma_0^{-1} + \sum_{i \neq n} \mathbb{I}[z_i = k] \cdot \Sigma_k^{-1}}$$

This is also called the infinite Gaussian mixture model (IGMM) [2], which clusters nodes with similar feature values, providing useful candidates for the coalescent to merge.

## 3 Generating Synthetic Data

To test how well the different methods capture hierarchical data, we generate synthetic hierarchical data with a known structure and test whether our model can recover the hierarchy. According to Berestycki [3], given  $n_{i-1}$  nodes at time  $t_{i-1}$  and  $t_i = t_{i-1} - \delta_i$ , the expected number of nodes that merge at time  $t_i$  is

$$1 + \delta_i \left( \sum_{k_i=2}^{n_{i-1}} (k_i - 1) \binom{n_{i-1}}{k_i} \lambda_{n_{i-1}}^{k_i} \right). \quad (2)$$

Therefore we start with  $n_0$  nodes, sample a duration time  $\delta_i$ , and compute the expected number of nodes to be merged at time  $t_i$ ; we then merge that number of nodes and repeat until there is only one node.

Next we generate the features for nodes from a Gaussian kernel. We start with the root node as a multivariate Gaussian distribution  $\mathcal{N}(\mu_0, \Sigma_0)$ , where the mean  $\mu_0 = (0, \dots, 0)$  and  $\Sigma_0 = \rho_0 \mathbf{I}$  ( $\mathbf{I}$  is the identity matrix). For each child, we sample the feature vector  $y_c$  from the parent Gaussian  $\mathcal{N}(y_p, \Sigma_p)$ , and set  $\Sigma_c = \frac{1}{n} \rho_p \mathbf{I}$ . In this experiment, we generate the data with parameter  $\rho_0 = 10$ . Labels are assigned based on the root's children; each subtree rooted at a child of the root receives the same label. This class label is used to calculate the metrics defined above.

## 4 Synthetic Trees

This section compares the constructed synthetic trees of Beta coalescent and Kingman's coalescent with the true synthetic trees. For all the following trees, the square nodes are the observed leaf nodes, and the circle nodes are the detected hidden internal nodes.

#### 4.1 Tree1: $n = 20$

- True synthetic tree

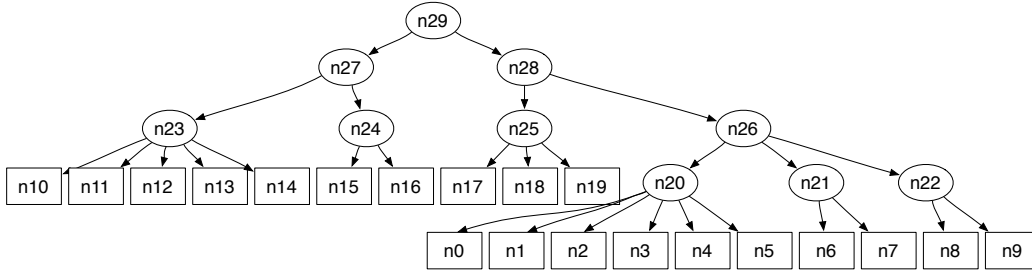

- Constructed tree from Beta coalescent

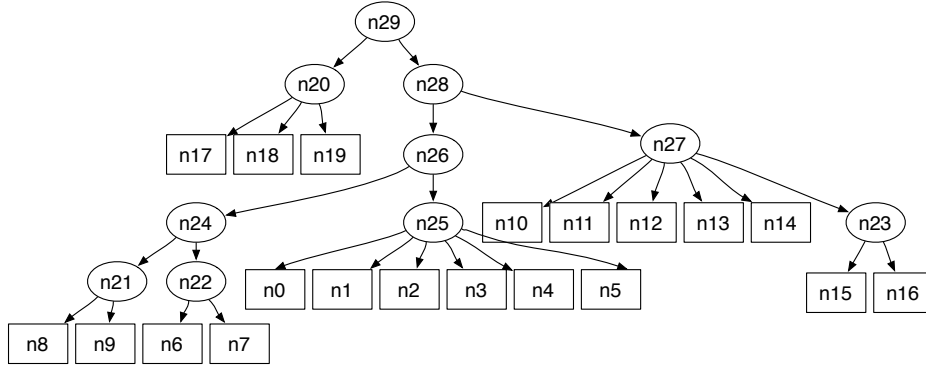

- Constructed tree from Kingman's coalescent

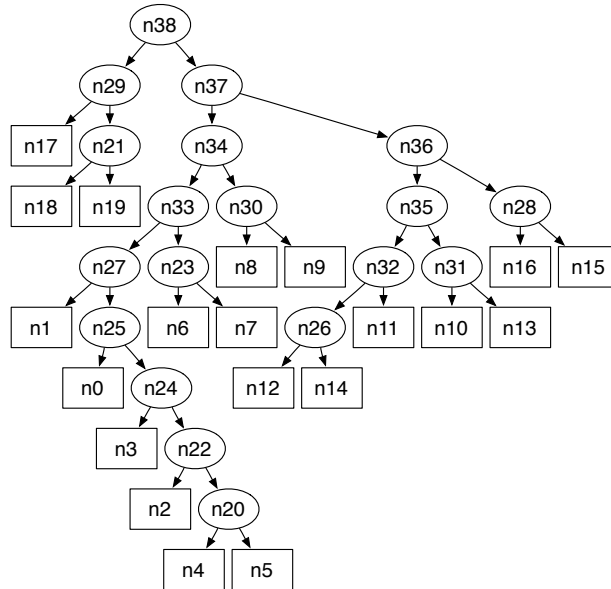

#### 4.2 Tree2: n = 20

- True synthetic tree

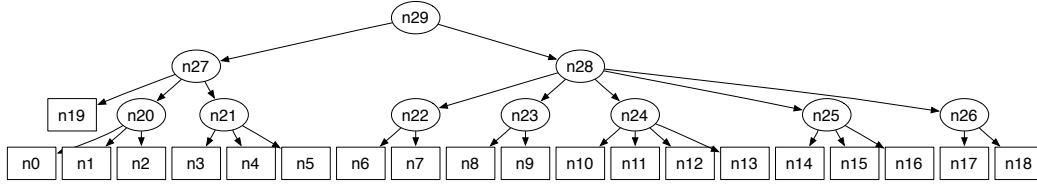

- Constructed tree from Beta coalescent

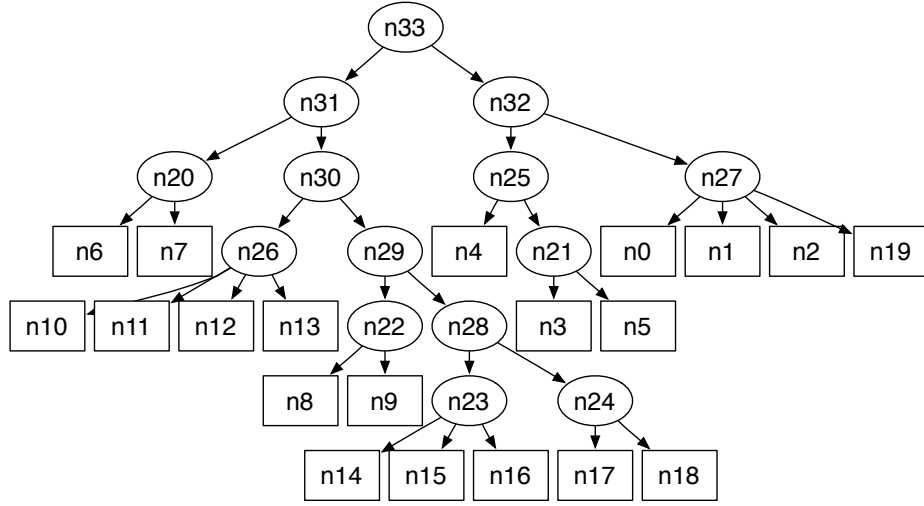

- Constructed tree from Kingman's coalescent

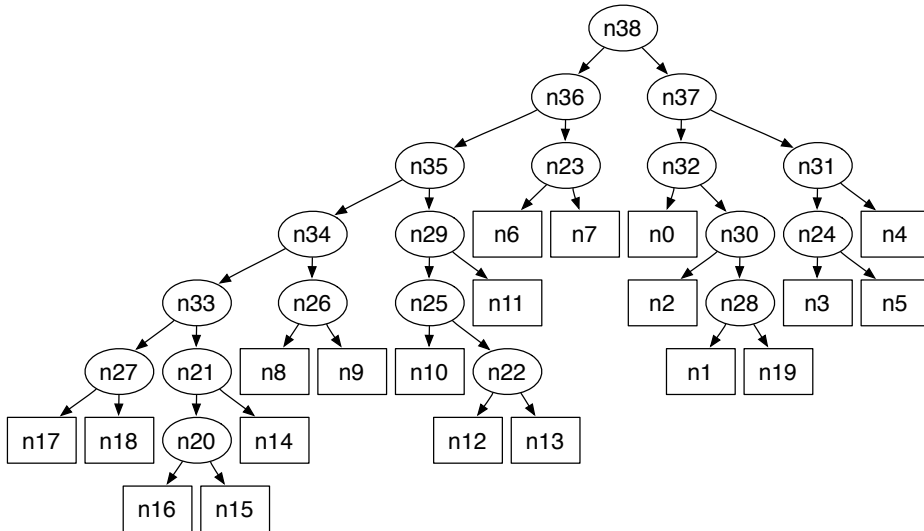

### 4.3 Tree3: n = 20

- True synthetic tree

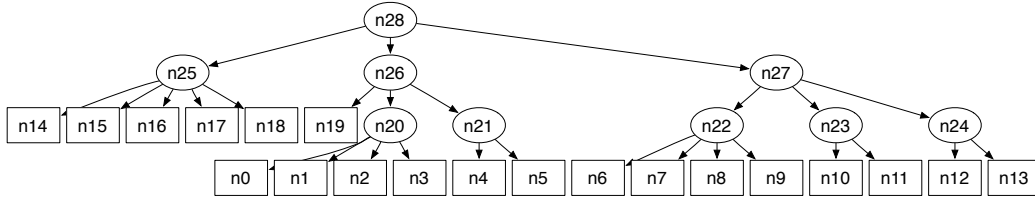

- Constructed tree from Beta coalescent

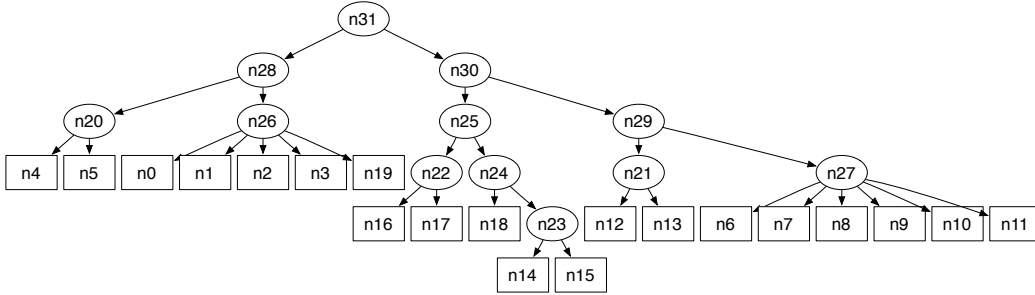

- Constructed tree from Kingman's coalescent

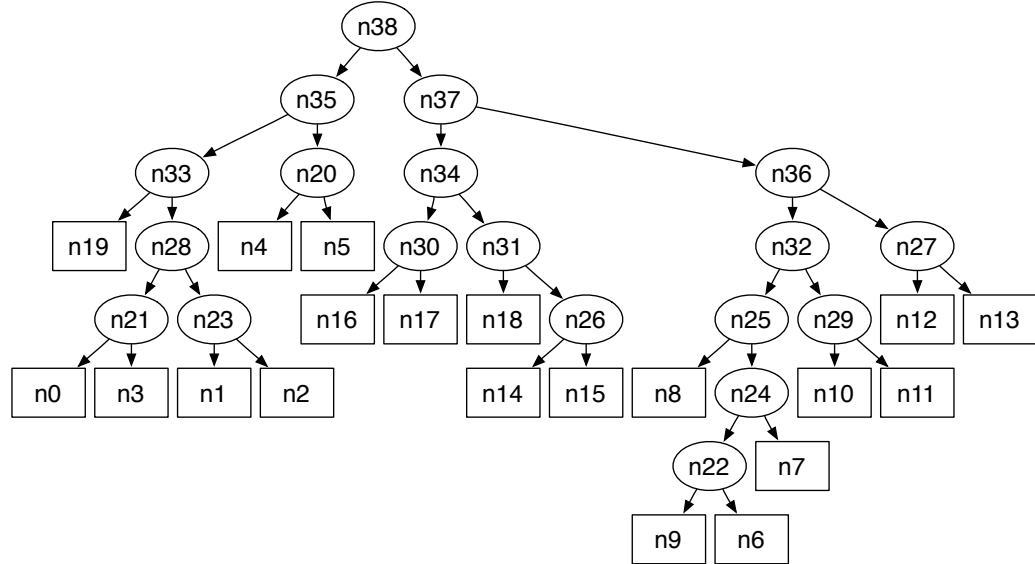

#### 4.4 Tree4: n = 40

- True synthetic tree

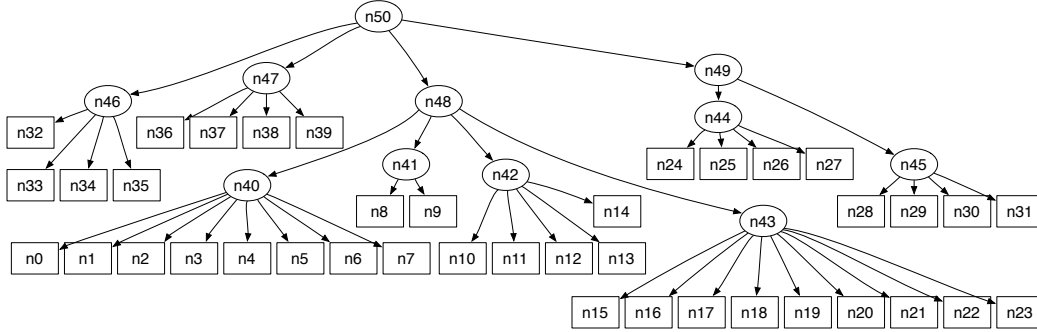

- Constructed tree from Beta coalescent

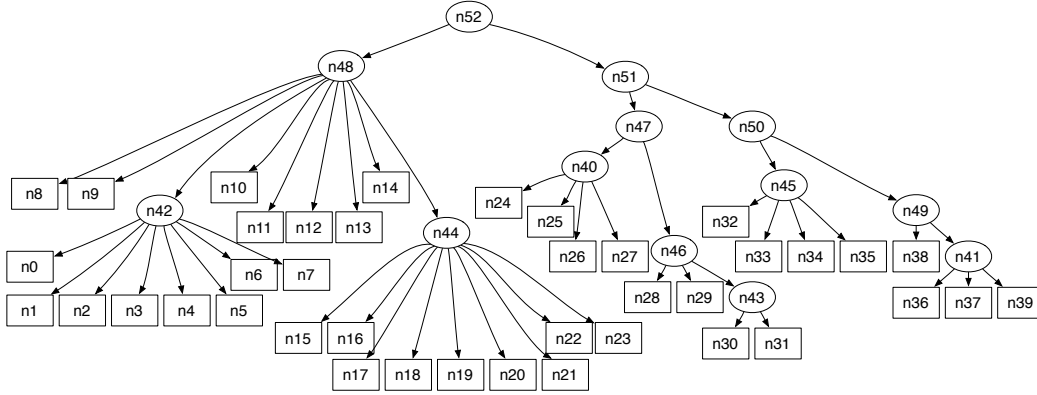

- Constructed tree from Kingman's coalescent

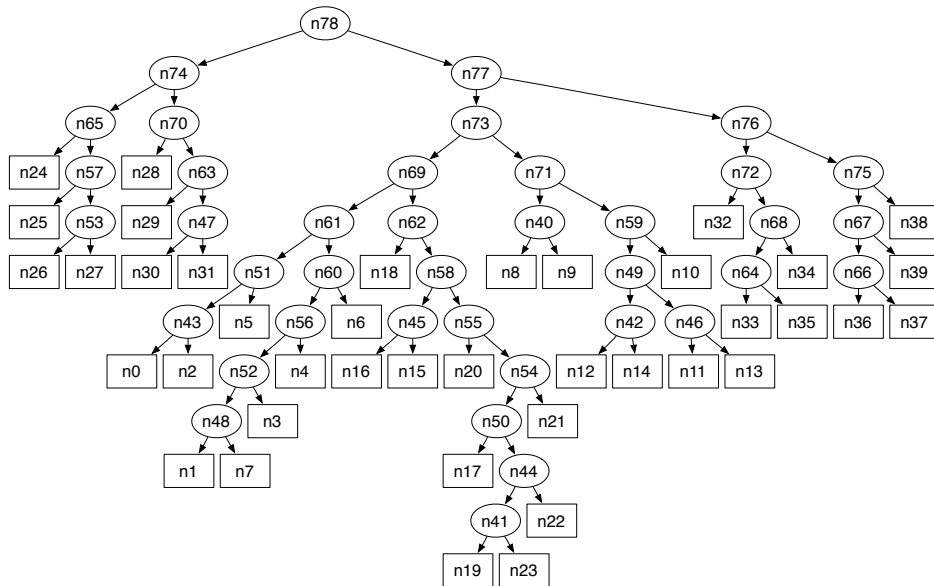

- True synthetic tree

- 

- 

-

## References

- [1] Neal, R. M. Markov chain sampling methods for Dirichlet process mixture models. *Journal of Computational and Graphical Statistics*, 9(2):249–265, 2000.
- [2] Rasmussen, C. E. The infinite Gaussian mixture model. In *NIPS*. 2000.
- [3] Berestycki, N. Recent progress in coalescent theory. In *Ensaïos Matematicos*, vol. 16. 2009.
